# Supplementary material
Source: PubMed Central journal article supplement (PMC6272126)
Supplement: NIHMS995278-supplement-Supplementary_Information.pdf [file NIHMS995278-supplement-Supplementary_Information.pdf]

## Supporting Information

### **Bioorthogonal metabolic labelling of nascent RNA in neurons improves the sensitivity of transcriptome-wide profiling**

Esmi L. Zajackowski<sup>†</sup>, Qiong-Yi Zhao<sup>†</sup>, Zong Hong Zhang<sup>†</sup>, Xiang Li<sup>†</sup>, Wei Wei<sup>†</sup>, Paul R. Marshall<sup>†</sup>, Laura J. Leighton<sup>†</sup>, Sarah Nainar<sup>‡</sup>, Chao Feng<sup>‡</sup>, Robert C. Spitale<sup>‡||\*</sup>, Timothy W. Bredy<sup>†\*</sup>

<sup>†</sup>Cognitive Neuroepigenetics Laboratory, Queensland Brain Institute, The University of Queensland, Brisbane, QLD, 4072, Australia

<sup>‡</sup>Department of Pharmaceutical Sciences and <sup>||</sup>Department of Chemistry, University of California, Irvine, Irvine, California, 92697, United States

# Table of Contents

|           |                                    |           |
|-----------|------------------------------------|-----------|
| <b>1.</b> | <b>Supplementary Figures .....</b> | <b>3</b>  |
| 1.1       | Supplementary Figure 1.....        | 3         |
| 1.2       | Supplementary Figure 2.....        | 4         |
| 1.3       | Supplementary Figure 3.....        | 5         |
| 1.4       | Supplementary Figure 4.....        | 6         |
| 1.5       | Supplementary Figure 5.....        | 7         |
| 1.6       | Supplementary Figure 6.....        | 8         |
| 1.7       | Supplementary Figure 7.....        | 9         |
| 1.8       | Supplementary Figure 8.....        | 10        |
| 1.9       | Supplementary Figure 9.....        | 12        |
| 1.10      | Supplementary Figure 10 .....      | 13        |
| <b>2.</b> | <b>Supplementary Tables.....</b>   | <b>14</b> |
| 2.1       | Supplementary Table 1 .....        | 14        |
| 2.2       | Supplementary Table 2 .....        | 15        |
| 2.3       | Supplementary Table 3 .....        | 16        |
| 2.4       | Supplementary Table 4 .....        | 17        |
| 2.5       | Supplementary Table 5.....         | 18        |

# 1. Supplementary Figures

## 1.1 Supplementary Figure 1

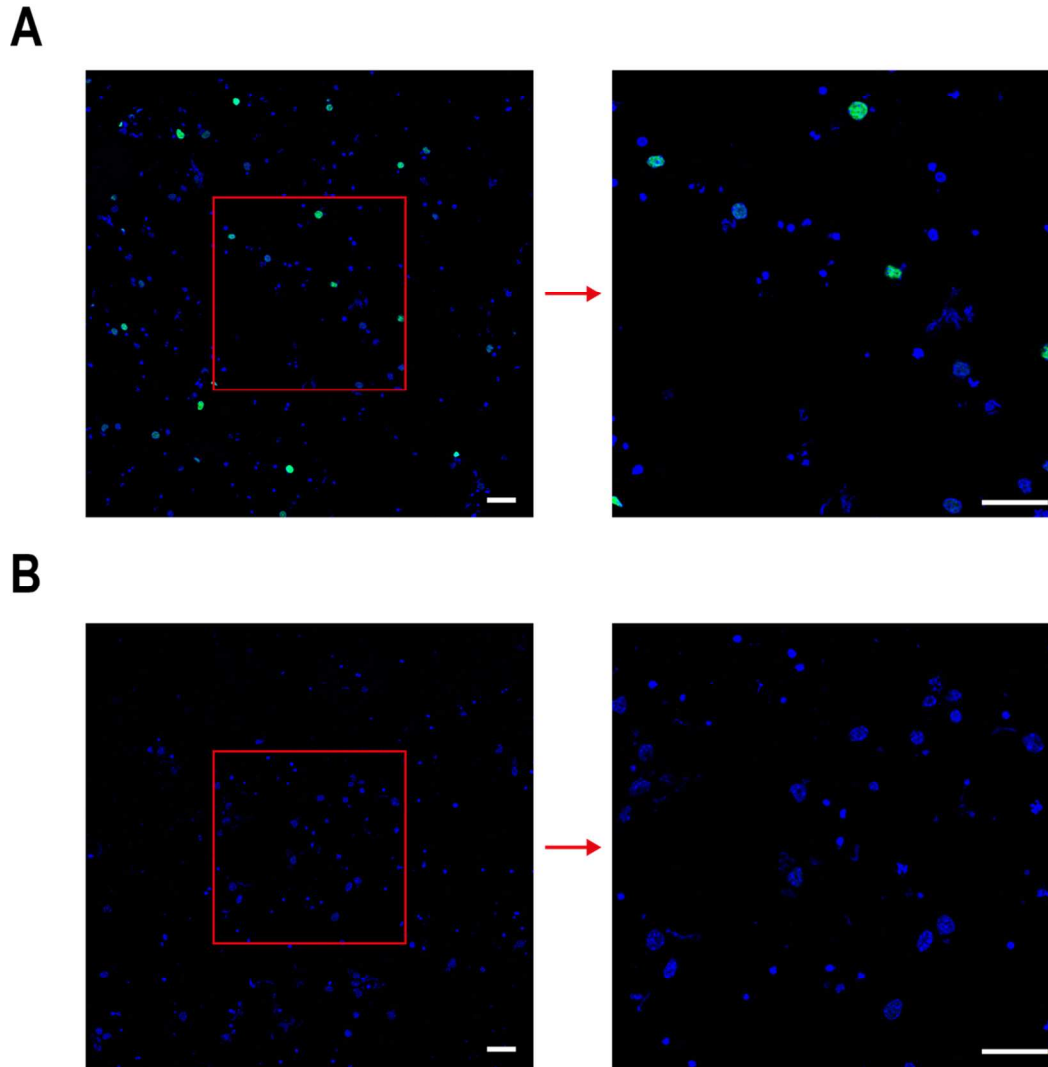

**Figure S1: Visualisation of nascent RNA labelled with 5Euracil using an azide-AlexaFluor488 fluorescent dye.**

**A)** Mouse primary cortical neurons (PCNs) treated with a synapsin I-driven UPRT lentivirus 7 days prior were fixed immediately following a 3 hour incubation with 5Euracil and KCl stimulation. Cells were then subjected to a CuAAC reaction (see Appendix 2) using 25  $\mu$ M azide-AlexaFluor488 (green) and counterstained with 4',6-Diamidino-2-Phenylindole, Dihydrochloride (DAPI, blue). **B)** Same as A) except cells were treated with a control GFP lentivirus 7 days prior instead. All images were taken on a ZIS LSM 510 META confocal microscope using a 63x oil objective, scale bar 50  $\mu$ m. Red boxes on left-hand side images outline the visual region displayed in the right-hand side image.

## 1.2 Supplementary Figure 2

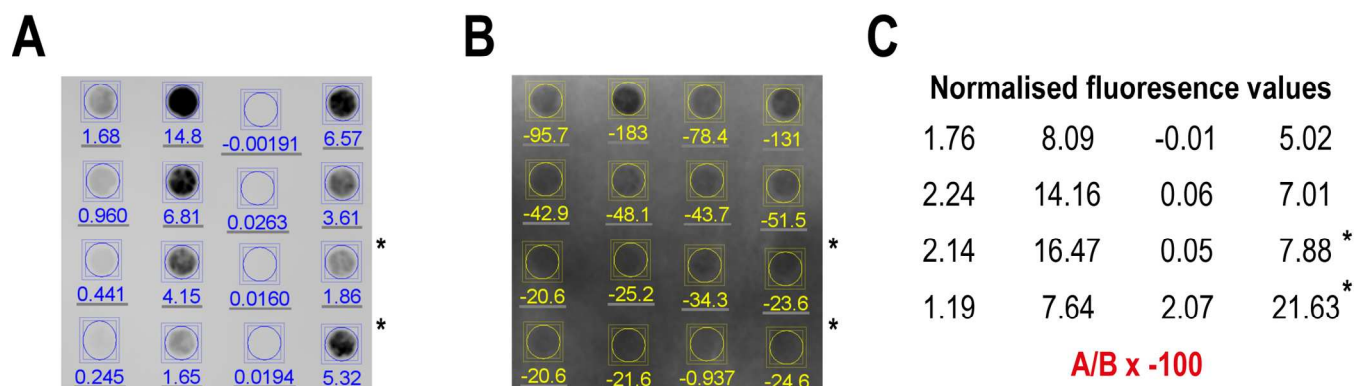

**Figure S2: UPRT overexpression is an effective method for capturing nascent RNA labelled with 5EUnacil.** **A)** Data shown is a dot blot of RNA biotinylated via CuAAC (see section 1.5.1 and 1.6, serial dilutions starting at 400 ng) and labelled with streptavidin-IR800CW. Total cellular RNA was harvested following 3 hours of KCl stimulation and incubation with nucleic analogs 5EUnacil or 5EUnidine. The four experimental conditions illustrated are as follows: GFP lentivirus with 5EUnacil (virus negative control), UPRT virus with 5EUnacil, UPRT virus without 5EUnacil (analog negative control), and no virus with 5EUnidine (analog positive control). Dot blot image was obtained using the LI-COR Odyssey Fc imaging system. **B)** Same dot blot as shown in A) but instead shows a methylene blue stain, which is used to visualise the total amount of RNA present. **C)** A semi-quantitative measure of the amount of alkyne-labelled RNA was calculated by taking the fluorescent values shown in A) and normalising them to values shown in B) (and multiplying by -100, formula in red). Note that samples with asterisks (\*) were mistakenly blotted in the wrong place and should be swapped around.

## 1.3 Supplementary Figure 3

### A

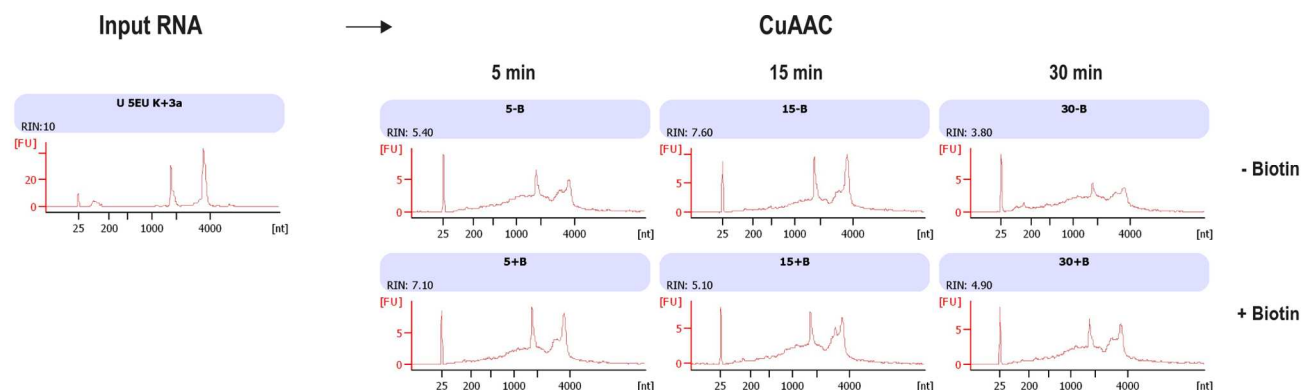

### B

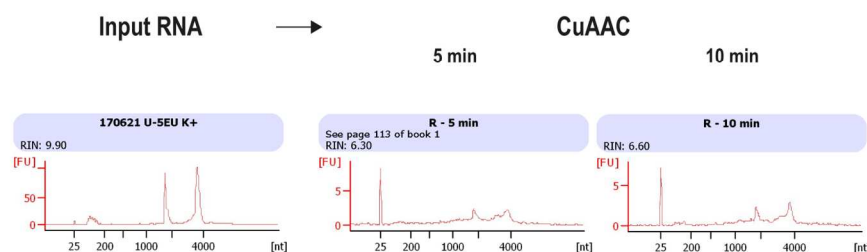

### C

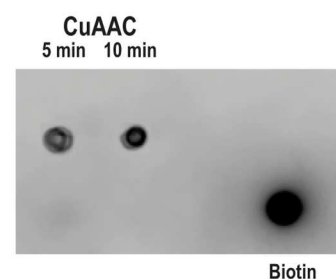

**Figure S3: Optimisation of the CuAAC reaction for biotinylation of alkyne-labelled nascent RNA.** **A)** Bioanalyser traces from six CuAAC reactions that were performed in parallel to investigate three reaction times (5, 15, 30 min) and 2 conditions (with and without azide-biotin) as well as the pre-CuAAC input RNA. RNA quality drops significantly by 30 min. **B)** Bioanalyser traces of pre-CuAAC input RNA and two reaction times for CuAAC (5, 10 min), which have roughly the same RNA quality (RIN 6 – 7). **C)** Dot blot of post-CuAAC RNA from B). 10 min CuAAC reaction time appears to yield a slightly better biotinylation amount as well as being easier to technically replicate with less time variability. Image was obtained using the LI-COR Odyssey Fc imaging system.

## 1.4 Supplementary Figure 4

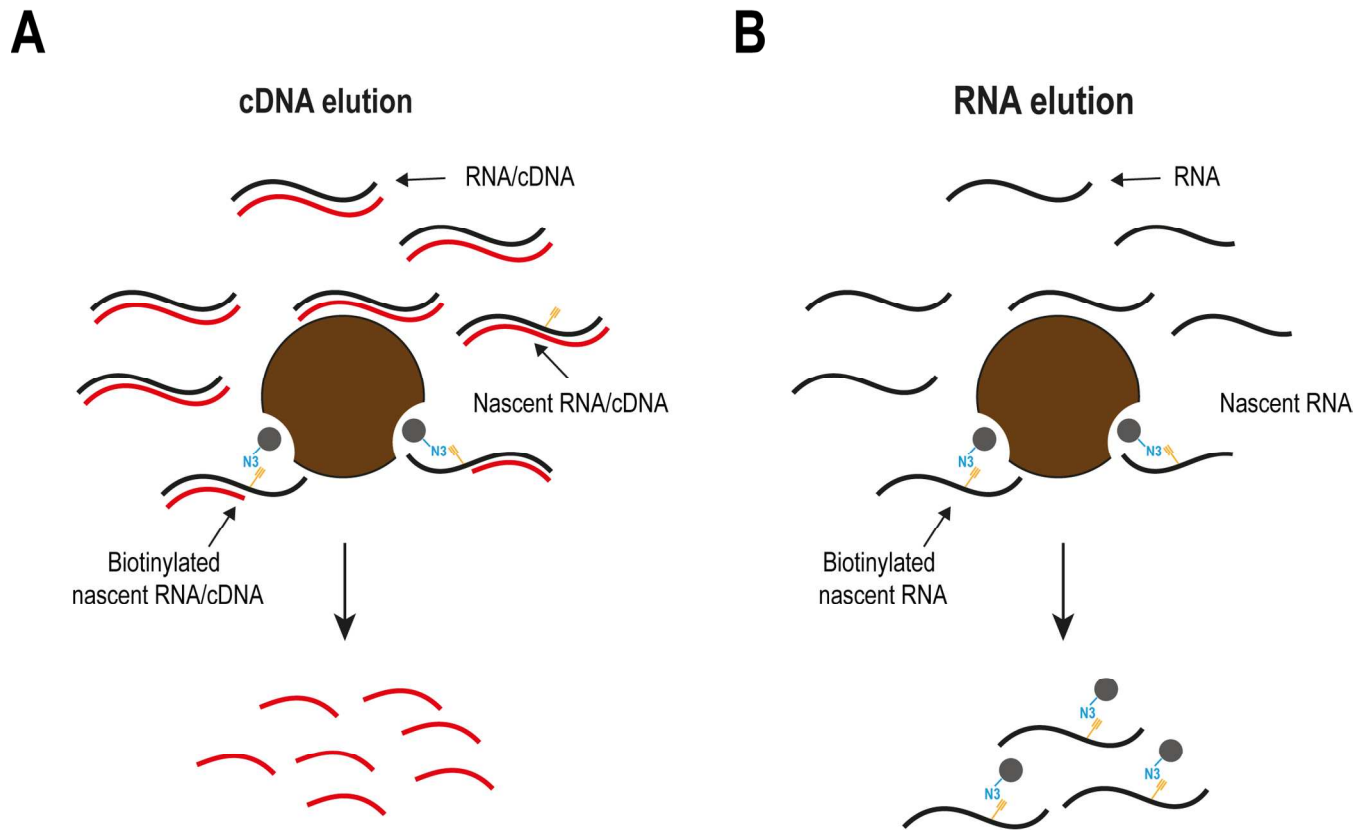

**Figure S4: Illustrative diagrams for streptavidin enrichment of nascent RNA/cDNA hybrids and nascent RNA.**

**A)** cDNA elution involves applying post-CuAAC RNA/cDNA hybrids to streptavidin beads and then degrading the RNA to allow the cDNA that was complementary to nascent RNA to be eluted. **B)** RNA elution involves directly binding post-CuAAC RNA to streptavidin beads followed by a heated chemical reaction to disrupt the biotin-streptavidin reaction and elute nascent RNA.

## 1.5 Supplementary Figure 5

**A**

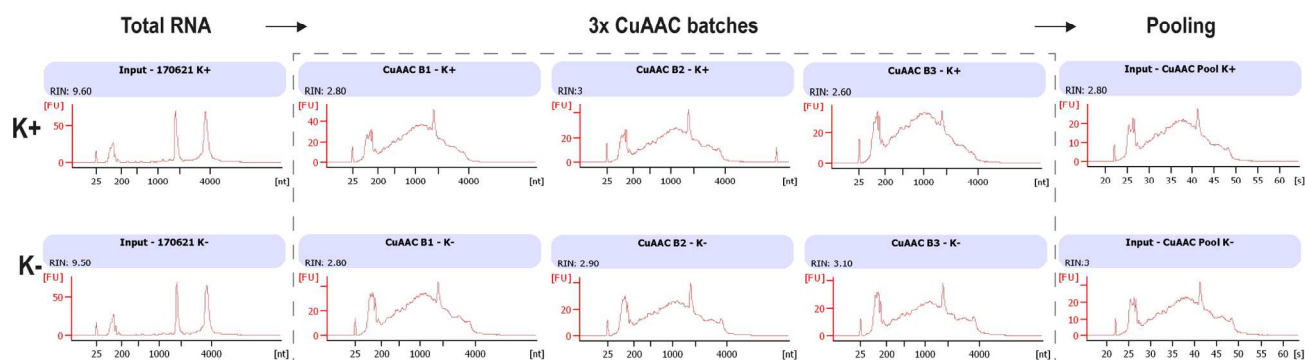

**B**

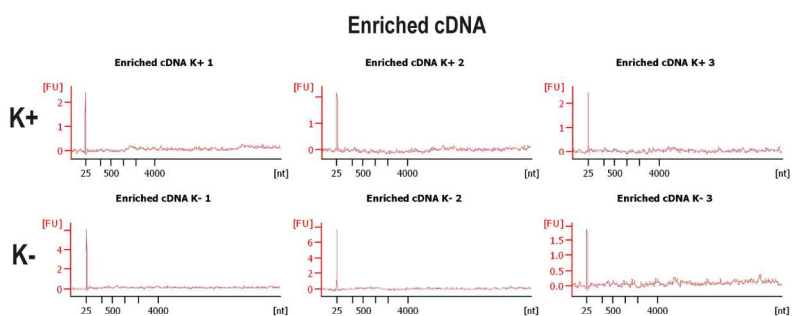

**C**

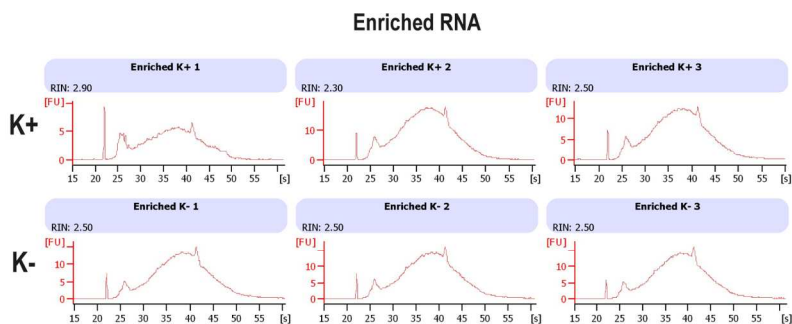

**Figure S5: RNA elution is a better method for enriching nascent RNA transcripts.** **A)** Biotinylated post-CuAAC RNA was generated in 3x batches each for non-activated (KCI-) and activated (KCI+) conditions and then pooled together. **B)** Enrichment of cDNA complementary to nascent RNA was performed in triplicate for each condition (KCI- vs KCI+) and run on the Agilent Bioanalyser (traces shown) using a HS DNA chip. Eluted cDNA was unquantifiable using both a Qubit assay (Invitrogen) and the Agilent Bioanalyser. **C)** Enrichment of nascent RNA was performed in triplicate for each condition (KCI- vs KCI+) and run on the Agilent Bioanalyser (traces shown) using a RNA Pico II chip. K: KCI.

## 1.6 Supplementary Figure 6

### A

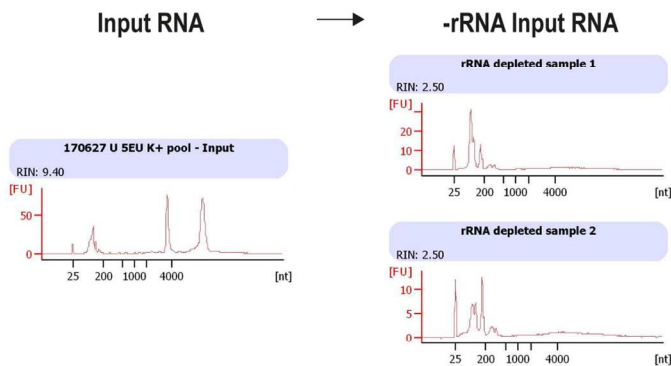

### B

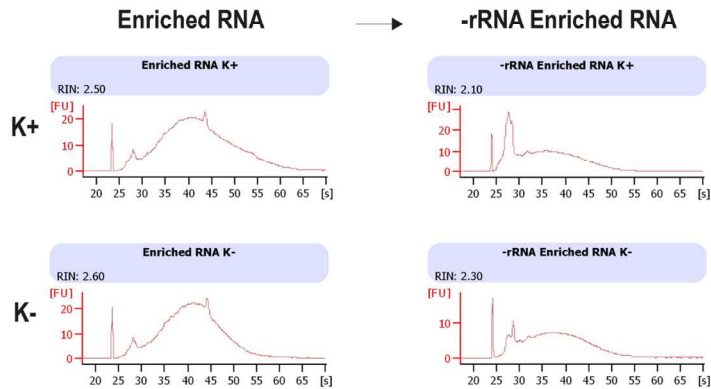

### C

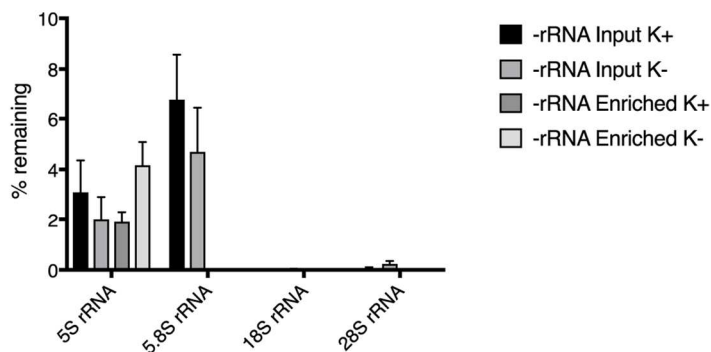

**Figure S6: Validating ribosomal RNA(rRNA) removal on input and enriched samples.** **A)** Bioanalyser traces showing the input sample before rRNA removal and after (performed twice), which indicates effective removal of larger 18S and 28S rRNA peaks. **B)** Bioanalyser traces for enriched (KCI- and KCI+) before and after rRNA removal seems to also have a reduced fraction of the larger fragments (presumably 18S and 28S rRNA). **C)** Bar chart showing the %remaining of 5S, 5.8S, 18S, 28S rRNA after rRNA removal. Data values were obtained from qPCR analysis (see section 1.3.2) by first normalising to housekeeping gene *Pgk1* and then calculating the fold change relative to the input sample before rRNA removal (and then multiplied by 100 to get %remaining).  $n=4$  per group. K: KCI.



## 1.7 Supplementary Figure 7

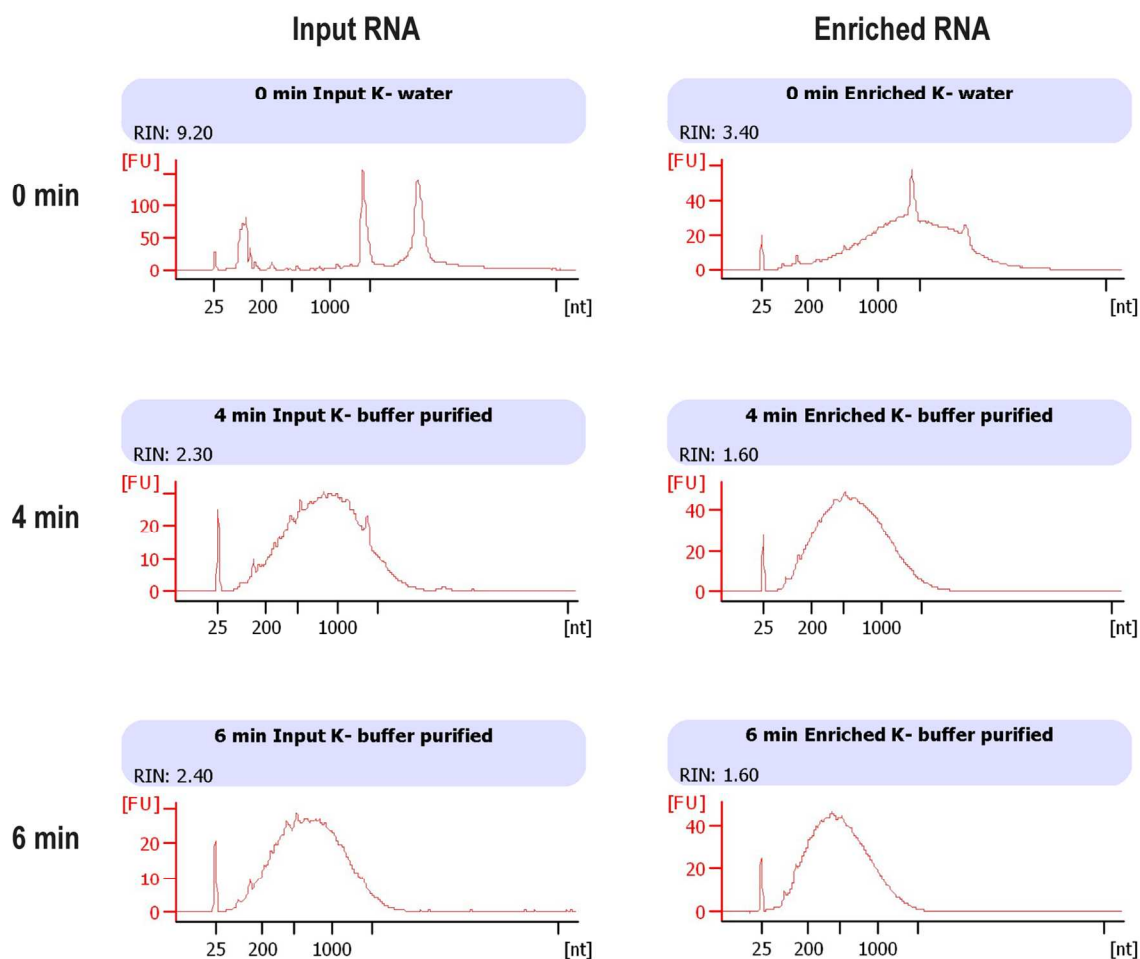

**Figure S7: Optimisation of RNA fragmentation prior to double-stranded cDNA (dscDNA) synthesis.** Input and enriched RNA samples were fragmented at 94°C in buffer and primer mix from the NEBNext® Ultra™ II RNA First Strand Synthesis Module (#E7771) for 4 and 6 min and then purified using the Zymo Research RNA Clean & Concentrator-5 kit (#R1014) before running on the Agilent Bioanalyser using a RNA Pico II chip.

# 1.8 Supplementary Figure 8

**A**

**Differentially expressed gene targets (KCI- vs KCI+)**

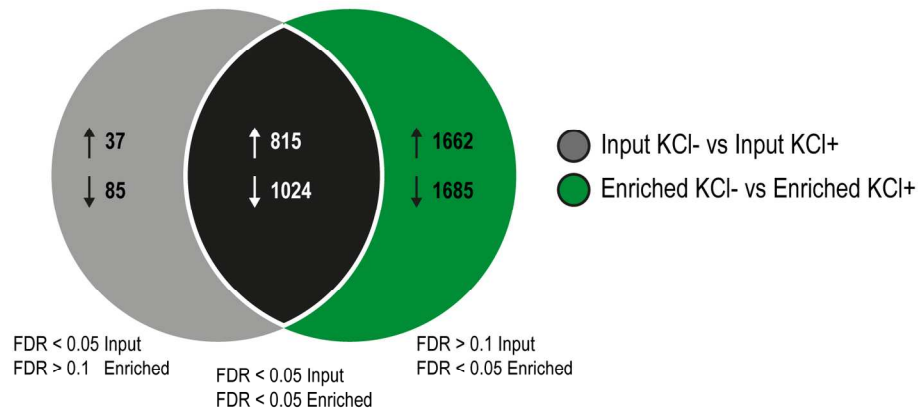

**B**

**Up-regulated in Input KCI+ (non-overlap)**

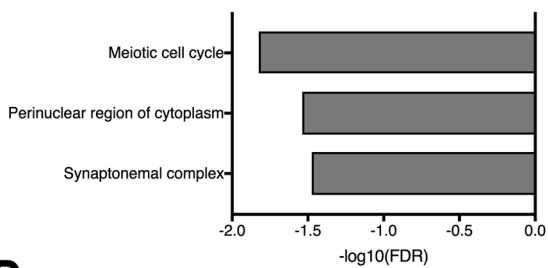

**C**

**Down-regulated in Input KCI+ (non-overlap)**

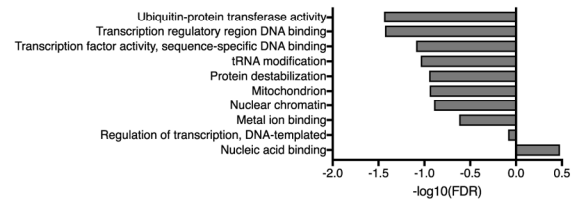

**D**

**Up-regulated in Input and Enriched KCI+ (overlap)**

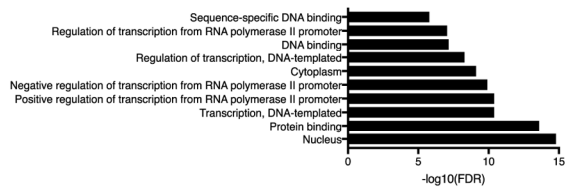

**E**

**Down-regulated in Input and Enriched KCI+ (overlap)**

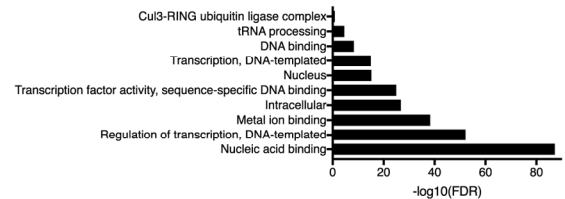

**F**

**Up-regulated in Enriched KCI+ (non-overlap)**

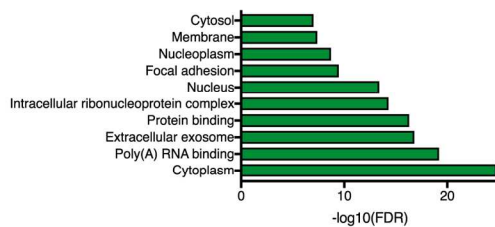

**G**

**Down-regulated in Enriched KCI+ (non-overlap)**

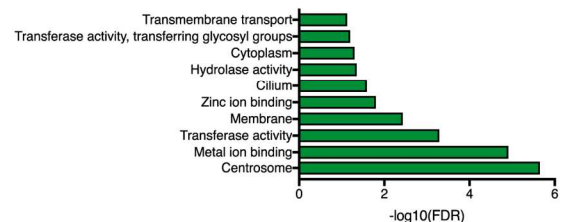

**Figure S1: DAVID functional annotation of differentially expressed target genes.** A) Venn diagram illustrating the overlap in target genes (up-regulated and down-regulated) between the comparisons “Input KCI+ vs Input KCI-” and “Enriched KCI+ vs

Enriched KCI-". **B) – G)** Each graph shows the top ten DAVID functional annotation Gene Ontology terms (smallest FDRs) with their respective  $-\log_{10}(\text{FDR})$  values (smaller FDR  $\rightarrow$  bigger and more positive value) for each set of genes illustrated in A).

## 1.9 Supplementary Figure 9

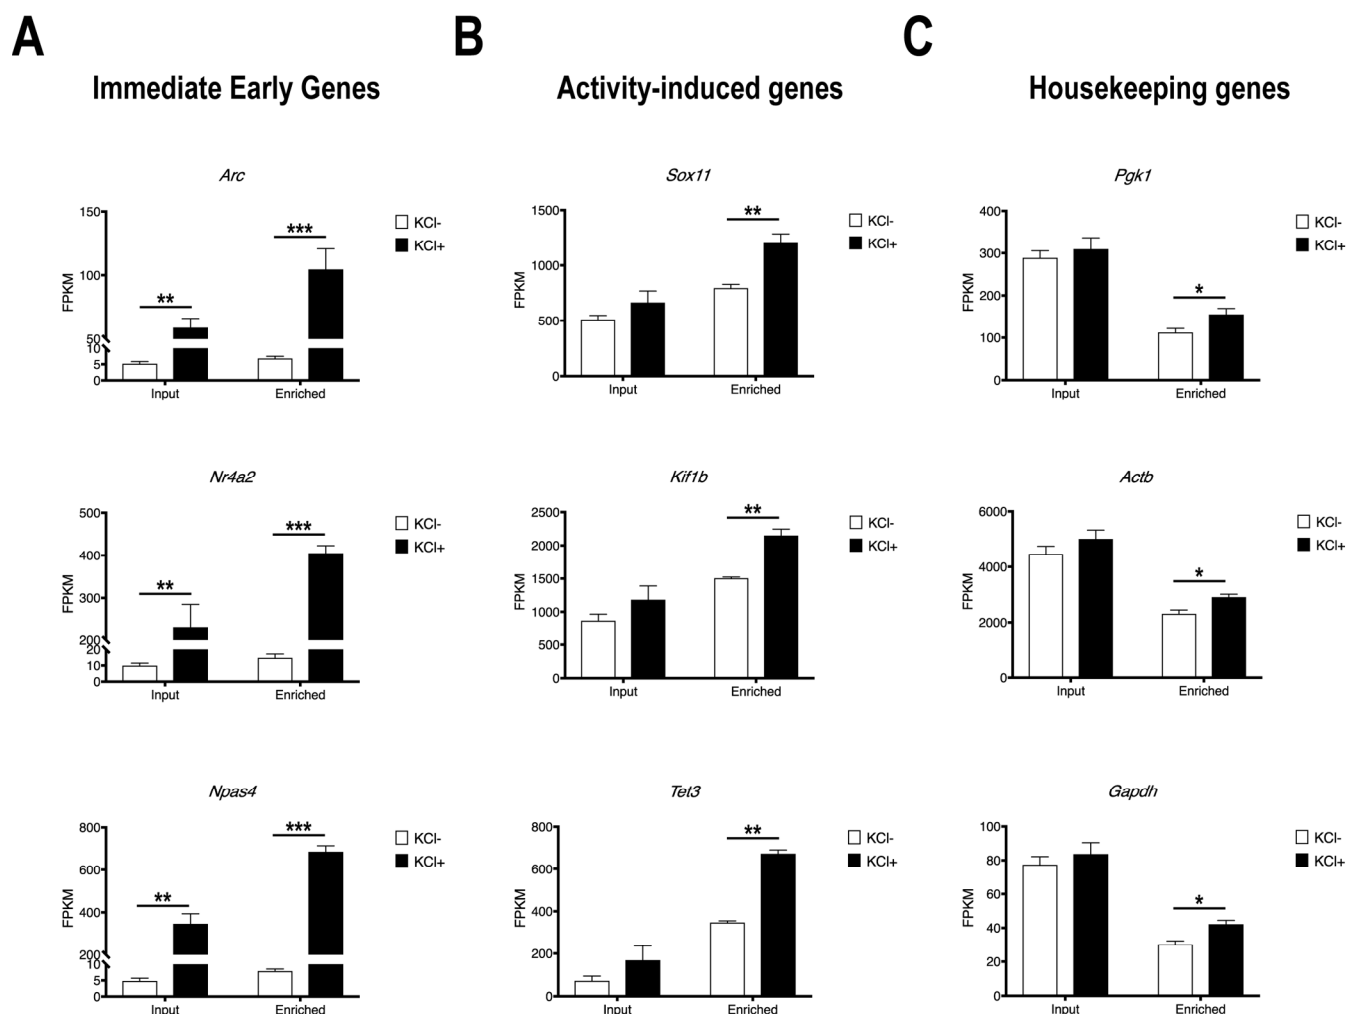

**Figure S9: Nascent RNA sequencing improves sensitivity for detecting differences in activity-dependent gene expression.** A) Nascent RNA sequencing is able to better detect Immediate Early Gene expression. B) Nascent RNA sequencing is able to detect activity-dependent differences in genes that are missed by standard total RNA-seq. C) Conventional housekeeping genes show a lower abundance of fragments after enrichment of nascent RNA (enriched) compared to total RNA-seq (input) but also exhibit activity-dependent differences in gene expression. \*FDR<0.05, \*\*FDR<0.001, \*\*\*FDR<0.000000001. FPKM: Fragments per Kilobase Million; FDR: False Discovery Rate; KCl: potassium chloride.

## 1.10 Supplementary Figure 10

**A**

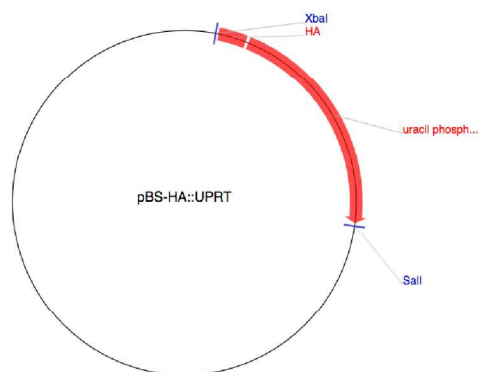

**B**

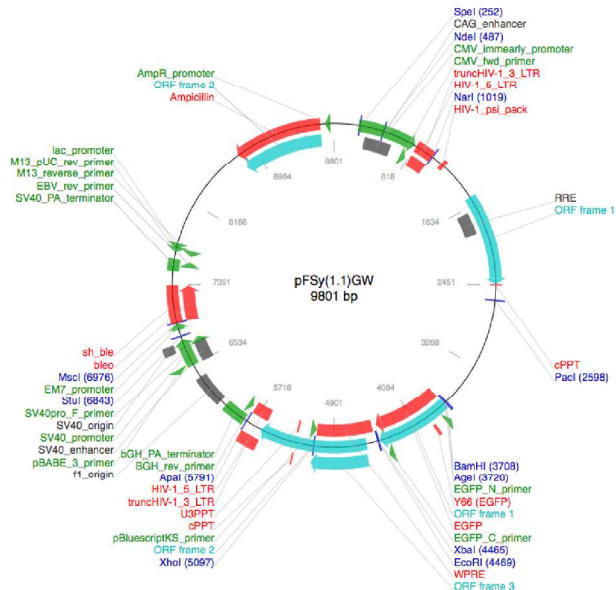

**Figure S10: Components used to generate the transfer vector pFSy(1.1)GW containing the HA::UPRT insert.** **A)** The pBS-HA::UPRT plasmid (kindly deposited by Mike Cleary & Chris Doe<sup>2</sup> into Addgene, plasmid #47110) was used as a template for PCR amplification of the HA::UPRT sequence. **B)** The original pFSy(1.1)GW vector (kindly deposited by Pavel Osten<sup>1</sup> into Addgene, plasmid #27232) before the HA::UPRT sequence replaced the EGFP sequence located in-between the BamHI and XbaI cutting sites. The original unmodified vector was packaged as a control. Images displayed are sourced from the Addgene website (<https://www.addgene.org/>).

## 2. Supplementary Tables

### 2.1 Supplementary Table 1

**Table 1: Single-indexed i7 adapter sequences for each sample ( $n = 4$  biological replicates per group) for a 2x lanes on a HiSeq 4000 2x150 run.**

|               | <b>Sample code</b> | <b>Sample name</b>  | <b>Single-indexed i7 adapter sequence</b> | <b>Kapa HyperPrep Kit Adapters Set A</b> |
|---------------|--------------------|---------------------|-------------------------------------------|------------------------------------------|
| Lane 1        | A1                 | -rRNA Input K+ 1    | ACAGTG                                    | 5                                        |
|               | A2                 | -rRNA Input K+ 2    | GCCAAT                                    | 6                                        |
|               | B1                 | -rRNA Input K- 1    | CTTGTA                                    | 12                                       |
|               | B2                 | -rRNA Input K- 2    | GTGAAA                                    | 19                                       |
|               | C1                 | -rRNA Enriched K+ 1 | CGATGT                                    | 2                                        |
|               | C2                 | -rRNA Enriched K+ 2 | TGACCA                                    | 4                                        |
|               | D1                 | -rRNA Enriched K- 1 | CAGATC                                    | 7                                        |
|               | D2                 | -rRNA Enriched K- 2 | CCGTCC                                    | 16                                       |
| Lane 2        | A3                 | -rRNA Input K+ 3    | CGATGT                                    | 2                                        |
|               | A4                 | -rRNA Input K+ 4    | TGACCA                                    | 4                                        |
|               | B3                 | -rRNA Input K- 3    | CAGATC                                    | 7                                        |
|               | B4                 | -rRNA Input K- 4    | CCGTCC                                    | 16                                       |
|               | C3                 | -rRNA Enriched K+ 3 | ACAGTG                                    | 5                                        |
|               | C4                 | -rRNA Enriched K+ 4 | GCCAAT                                    | 6                                        |
|               | D3                 | -rRNA Enriched K- 3 | CTTGTA                                    | 12                                       |
|               | D4                 | -rRNA Enriched K- 4 | GTGAAA                                    | 19                                       |
| Naming scheme | <b>A</b>           | -rRNA Input K+      | 4x biological replicates                  | A1, A2, A3, A4                           |
|               | <b>B</b>           | -rRNA Input K-      | 4x biological replicates                  | B1, B2, B3, B4                           |
|               | <b>C</b>           | -rRNA Enriched K+   | 4x biological replicates                  | C1, C2, C3, C4                           |
|               | <b>D</b>           | -rRNA Enriched K-   | 4x biological replicates                  | D1, D2, D3, D4                           |

## 2.2 Supplementary Table 2

**Table 2: Primers for generating the synapsin I-driven UPRT overexpression lentivirus.** Two rounds of PCR amplification were used to amplify and add XbaI and BamHI restriction sites to the HA::UPRT fragment obtained from the pBS-HA::UPRT plasmid (Addgene #47110) prior to digestion and cloning into the pFsy(1.1)GW vector backbone (Addgene #27232), replacing the original EGFP sequence.

|                                                                                                                                                                                                                                                                                                                                                                                                                                                                                                                                                                                                                                                                                                                                                                                                                                                                                                                                      | <b>Primers</b>                                                                                                                             | <b>Notes</b>                                                                                                               |
|--------------------------------------------------------------------------------------------------------------------------------------------------------------------------------------------------------------------------------------------------------------------------------------------------------------------------------------------------------------------------------------------------------------------------------------------------------------------------------------------------------------------------------------------------------------------------------------------------------------------------------------------------------------------------------------------------------------------------------------------------------------------------------------------------------------------------------------------------------------------------------------------------------------------------------------|--------------------------------------------------------------------------------------------------------------------------------------------|----------------------------------------------------------------------------------------------------------------------------|
| <b>Round 1:</b><br>+ XbaI                                                                                                                                                                                                                                                                                                                                                                                                                                                                                                                                                                                                                                                                                                                                                                                                                                                                                                            | <u>Forward:</u> 5'- <b>ATGTACCCCTACGATGT</b> -3'<br><u>Reverse:</u> 5'-AAA <b>TCTAGACTACATGGTTCCAAAGT</b> -3'                              | XbaI restriction site:<br><b>TCTAGA</b>                                                                                    |
| <b>Round 2:</b><br>+ Kozak<br>+ BamHI                                                                                                                                                                                                                                                                                                                                                                                                                                                                                                                                                                                                                                                                                                                                                                                                                                                                                                | <u>Forward:</u> 5'-AAA<br><b>GGATCCGCCGCCACC</b> <b>ATGTACCCCTACGATGT</b> -3'<br><u>Reverse:</u> 5'-AAA <b>TCTAGACTACATGGTTCCAAAGT</b> -3' | BamHI restriction site:<br><b>GGATCC</b><br>Kozak sequence:<br><b>GCCGCCACC</b><br>XbaI restriction site:<br><b>TCTAGA</b> |
| <b>HA::UPRT coding sequence</b><br><b>ATGTACCCCTACGATGT</b> GCCCCGATTACGCCACTAGTGCTAGCAGATCTGCGGCCAACATGGCGCA<br>GGTCCCAGCGAGCGGAAAGCTCCTTGTCGATCCCCGATATTCGACAAACGACCAGGAAGAAAGC<br>ATTCTCCAGGACATCATCACGAGGTTTCCCAATGTGGTGCTCATGAAGCAGACGGCTCAGCTTCG<br>AGCGATGATGACCATCATTTCGTGATAAAGAAACACCCGAAGGAAGAATTCGTCTTCTACGCCGACC<br>GCCTGATTCGCCTCCTCATCGAAGAAGCTTTGAACGAACTGCCGTTTCGAAAAGAAGGAAGTGACA<br>ACCCCTCTGGATGTGTCATACCATGGAGTTTCCTTCTATTCCAAGATCTGTGGCGTCTCGATTGTG<br>AGAGCTGGCGAGTCGATGGAAAGCGGCTTGCGGGCAGTTTGCCGCGGCTGCCGCATCGGGAAA<br>ATCCTCATCCAGAGAGACGAAACAACCTGCGGAGCCTAAGCTGATCTACGAGAAGCTGCCTGCCGA<br>CATTAGAGATCGCTGGGTGATGCTGCTAGATCCGATGTGCGCGACGGCGGGCAGTGTGTGCAA<br>GCGATCGAGGTCTCCTGAGGCTCGGCGTGAAGGAAGAGAGAATCATTTTCGTCAACATTTTGGC<br>TGCTCCCCAAGGCATTGAACGTGTTTTCAAGGAATACCCGAAAGTCCGCATGGTCACTGCTGCTG<br>TTGACATCTGCCTGAACCTCGAGGTAACATCGTCCCCGGCATTGGTGATTTCCGGTGACCGGT <b>AC</b><br><b>TTTGAACCATGTAG</b> |                                                                                                                                            |                                                                                                                            |

## 2.3 Supplementary Table 3

**Table 3: qPCR primers used during the study to investigate the effect of synapsin I-driven UPRT lentivirus on UPRT expression within mouse primary cortical neurons.**

| <b>Target</b> | <b>Primer</b> | <b>Primer sequence (5'-3')</b> |
|---------------|---------------|--------------------------------|
| <i>Pgk1</i>   | qPGK F        | TGCACGCTTCAAAAAGCGCACG         |
|               | qPGK R        | AAGTCCACCCTCATCACGACCC         |
| <i>Uprt</i>   | qUPRT F       | GATTGTGAGAGCTGGCGAGT           |
|               | qUPRT R       | GCAGGCAGCTTCTCGTAGAT           |



## 2.4 Supplementary Table 4

**Table 4: qPCR primers used to validate ribosomal RNA removal.**

| <b>Target</b> | <b>Primer</b> | <b>Primer sequence (5'-3')</b> |
|---------------|---------------|--------------------------------|
| <i>Pgk1</i>   | qPGK F        | TGCACGCTTCAAAAGCGCACG          |
|               | qPGK R        | AAGTCCACCCTCATCACGACCC         |
| 5S rRNA*      | q5SrRNA F     | CATACCACCCTGAACGCG             |
|               | q5SrRNA R     | CTACAGCACCCGGTATTCCC           |
| 5.8S rRNA     | q5.8SrRNA F   | GACTCTTAGCGGTGGATCAC           |
|               | q5.8SrRNA R   | GCAAGTGCGTTCGAAGTGT            |
| 18S rRNA      | q18SrRNA F    | CTGGATACCGCAGCTAGGAA           |
|               | q18SrRNA R    | GAATTTACCTCTAGCGGCG            |
| 28S rRNA      | q28SrRNA F    | AAGCGTTGGATTGTTACCCC           |
|               | q28SrRNA R    | TCCTCAGCCAAGCACATACA           |

\* 5S rRNA primer pair is non-specific; it also picks up expression of *Tmem38b*, which encodes a mouse transmembrane protein.

## 2.5 Supplementary Table 5

**Table 5: Total and mappable reads for samples sequenced using a 2x150 run on a HiSeq 4000.**

| Sample ID     | Sample name         | Total reads       | Mappable reads           | Ratio (%)      |
|---------------|---------------------|-------------------|--------------------------|----------------|
| A1            | -rRNA Input K+ 1    | 99,268,860        | 86,422,585               | 87.06          |
| A2            | -rRNA Input K+ 2    | 116,477,742       | 100,426,648              | 86.22          |
| A3            | -rRNA Input K+ 3    | 101,906,268       | 87,531,669               | 85.89          |
| A4            | -rRNA Input K+ 4    | 91,429,842        | 67,865,072               | 74.23          |
| B1            | -rRNA Input K- 1    | 104,976,440       | 91,819,904               | 87.47          |
| B2            | -rRNA Input K- 2    | 115,971,574       | 94,061,984               | 81.11          |
| B3            | -rRNA Input K- 3    | 80,656,104        | 69,732,454               | 86.46          |
| B4            | -rRNA Input K- 4    | 110,339,894       | 90,770,763               | 82.26          |
| C1            | -rRNA Enriched K+ 1 | 116,782,840       | 96,929,752               | 83.00          |
| C2            | -rRNA Enriched K+ 2 | 102,594,202       | 82,353,665               | 80.27          |
| C3            | -rRNA Enriched K+ 3 | 119,252,686       | 99,048,592               | 83.06          |
| C4            | -rRNA Enriched K+ 4 | 139,448,294       | 119,270,005              | 85.53          |
| D1            | -rRNA Enriched K- 1 | 97,335,200        | 82,714,249               | 84.98          |
| D2            | -rRNA Enriched K- 2 | 106,035,272       | 85,824,224               | 80.94          |
| D3            | -rRNA Enriched K- 3 | 92,890,624        | 78,885,906               | 84.92          |
| D4            | -rRNA Enriched K- 4 | 102,807,580       | 80,488,372               | 78.29          |
|               |                     |                   |                          |                |
| Naming scheme | <b>A</b>            | -rRNA Input K+    | 4x biological replicates | A1, A2, A3, A4 |
|               | <b>B</b>            | -rRNA Input K-    | 4x biological replicates | B1, B2, B3, B4 |
|               | <b>C</b>            | -rRNA Enriched K+ | 4x biological replicates | C1, C2, C3, C4 |
|               | <b>D</b>            | -rRNA Enriched K- | 4x biological replicates | D1, D2, D3, D4 |
